# Supplementary material for: The Mental Health Decline in Children during the Covid-19 Pandemic.
Source: Research Square preprint supplement (doi:10.21203/rs.3.rs-4542313/v1), 2024-06-21
Supplement: Supplementary file 1 [file 56144c02ff5309fbcd1575ee.docx]

| Table 2. Health Coverage Types, Preventive Medical Care Indicators, Sleep Disturbances, Anxiety and Depression by Anxiety, Depression and Difficult Social Behaviors in Children aged 2 to 18 years in the United States, NHIS: 2019-2020 | | | |
| --- | --- | --- | --- |
|  | Anxiety* | Depression* | Difficult Social Behavior* |
|  | (Unweighted Number)(Weighted Percent) (Confidence Intervals) | | |
| ***Child’s Gender*** |  | | |
| *Male* | 1,161(19.9)(18.4,21.3) | 499(8.3)(7.4,9.3) | 1,062(19.6)(18.2,21.1) |
| *Female* | 1,329(23.4)(21.8,24.9) | 660 (12.1)(10.8,13.5) | 591(11.5)(10.3,12.7) |
| Rao Scott Chi- square  P-Value | <..01 | <.0001 | <.0001 |
| ***Child’s Age-Group in years*** |  |  |  |
| 2 to 4* | ---------------------- | ---------------------- | ---------------------- |
| 5 to 11 | 1,048(19.8)(18.3,21.2) | 390(7.9)(6.8,9.0) | 927(18.3)(16.9,19.7) |
| 12 to 14 | 615(22.0)(19.9,24.1) | 309(11.6)(9.9,13.3) | 372(13.7)(11.9,15.4) |
| 15 to 17 | 828(25.3)(23.2,27.4) | 460(13.8)(12.2,15.4) | 355 (11.8)(10.4,13.3) |
| Rao Scott Chi- square  P-Value | <.0001 | <.0001 | <.0001 |
| ***Race/ethnicity*** |  |  |  |
| Hispanic | 448(17.1)(15.0,19.2) | 216(7.7)(6.4,9.0) | 355(14.5)(12.6,16.4) |
| Non-Hispanic White | 1,675(27.3)(25.8,28.8) | 747(12.6)(11.4,13.9) | 926(16.1)(14.8,17.5) |
| Non-Hispanic Black | 138(10.2)(8.1,12.4) | 88(6.8)(4.9,8.7) | 190(17.5)(14.7,20.3) |
| Non-Hispanic Asian | 112(12.5)(9.7,15.4) | 57(6.2)(4.3,8.1) | 103(12.5)(9.4,15.6) |
| Rao Scott Chi- square  P-Value | <.0001 | <.0001 | NS |
| ***Region of Residence of Child*** |  |  |  |
| Northeast | 425(22.8)(20.2,25.5) | 170(8.8)(6.8,10.8) | 282(15.8)(13.5,18.0) |
| Midwest | 615(26.5)(23.7,29.2) | 301(12.9)(10.7,15.0) | 385(18.1)(15.5,20.8) |
| South | 788(18.2)(16.6,19.8) | 397(9.7)(8.4,11.0) | 612(16.1)(14.7,17.5) |
| West | 663(22.0)(19.7,24.2) | 291(9.5)(8.,11.0) | 375(12.9)(11.1,14.7) |
| Rao Scott Chi- square  P-Value | <.0001 | <.05 | <.01 |
| ***Highest Level of Education of all Adults in Family*** |  |  |  |
| No high school diploma | 88(14.9)(11.0,18.9) | 60(9.6)(6.3,12.9) | 111(20.0)(15.5,24.6) |
| High school graduate | 334(16.8)(14.5,19.0) | 186(8.7)(7.2,10.2) | 323(18.2)(15.9,20.5) |
| Some college or Associate Degree | 748(21.8)(19.8,23.8) | 363(10.6)(9.0,12.2) | 544(17.3)(15.5,19.1) |
| College degree | 1,138(24.0)(22.4,25.5) | 483(10.4)(9.2,11.7) | 598(13.3)(12.0,14.6) |
| Professional or Graduate Degree | 183(24.9)(20.7,29.1) | 67(11.0)(7.4,14.6) | 631(88.0)(84.5,91.4) |
| Rao Scott Chi- square  P-Value | <.0001 | NS | <.0001 |
| ***Poverty Index Ratio***** |  |  |  |
| Less than 100% of the Federal Poverty Line | 18.1(15.2,21.0) | 10.3(8.2,12.4) | 24.8(21.6,28.0) |
| 100 to 199% of the Federal Poverty Line | 18.7(16.3,21.1) | 10.5(8.6,12.0) | 17.6(15.4,19.9) |
| 200 to 399% of the Federal Poverty Line | 21.9(20.0,23.7) | 10.0(8.5,11.5) | 13.1(11.6,14.6) |
| 400% or More of the Federal Poverty Line | 25.1(23.4,26.9) | 9.9(8.6,11.3) | 13.2(11.6,14.7) |
| Rao Scott Chi- square  P-Value | <.0001 | NS | <.0001 |
| ***Family Healthcare Type*** |  |  |  |
| Private Insurance | 7,366(12.9)(11.7,14.1) | 5,705(9.8)(8.6,10.9) | 7,366(12.9)(11.7,14.1) |
| Medicaid | 6,503(21.3)(19.3,23.3) | 3,709(10.9)(9.4,12.5) | 6,503(21.3)(19.3,23.3) |
| No Coverage | 638(14.7)(10.7,18.7) | 535(8.0)(5.5,10.6) | 6,38(14.7)(10.7,18.7) |
| Rao Scott Chi- square  P-Value | <.0001 | NS | <.0001 |
| ***Sleep Disturbances and Social Behaviors*** |  |  |  |
| **Child Wakes Up Well Rested*** | 993(22.5)(20.8,24.2) | 427(10.5)(9.2,11.9) | 62 (16.4)(14.8,17.9) |
| Rao Scott Chi- square  P-Value | <.001 | <.0001 | <.01 |
| **Child has Difficulty Getting Out of Bed*** | 657(27.1)(24.5,29.7) | 330(14.5)(12.4,16.7) | 443(20.4)(18.3,22.6) |
| Rao Scott Chi- square  P-Value | <.0001 | <.0001 | <.0001 |

*Children aged 2 years or less were not assessed for depression, anxiety and social behaviors and were excluded from the regression analysis.

**Variable not available in 2019
