# Supplementary material for: The Mental Health Decline in Children during the Covid-19 Pandemic.
Source: Research Square preprint supplement (doi:10.21203/rs.3.rs-4542313/v1), 2024-06-21
Supplement: Supplementary file 2 [file c02efdc4a49b9ab2a27523f2.docx]

| Table 1. Health Coverage Types, Preventive Medical Care Indicators, Sleep Disturbances, Anxiety and Depression by Survey Year in Children aged 2 to 18 years in the United States, NHIS: 2019-2020 | | | |
| --- | --- | --- | --- |
|  | 2019 | 2020 |  |
| *Characteristic* |  | | Rao Scott Chi- square P-Value |
| ***Overall unweighted sample size by year*** | 4,194 | 5,172 |  |
|  | (Unweighted Number)(Weighted Percent) (Confidence Intervals) | | |
| ***Place of healthcare of Child*** |  |  |  |
| Doctor’s office | 7,555(95.0)(94.4,95.7) | 4,853(95.8)(95.0,96.6) | NS |
| Urgent Care | 310(3.9)(3.3,4.5) | 164(3.2)(2.5,3.9) |  |
| Emergency room | 34(.36)(.21,.50) | 16(.38)(.16,.60) |  |
| Some other place | 37(.48)(.30,.67) | 20(.43)(.18,.67) |  |
| Does not go to one place most often | 7(.09)(.01,.18) | 3(.05)(0.0,0.1) |  |
| ***Health Care Utilization Indicators for Child***** |  |  |  |
| **Mental Health Services were Received** | 458(26.0)(23.2,28.9) | 346(34.1)(30.5,37.7) | NS |
| **Delay in medical care due to Covid-19*** | ------------------------------- | 257(13.8)(11.7,15.9) | <.0001 |
| **Denied medical care due to Covid-19*** | ------------------------------- | 149(8.4)(6.7,10.1) | <.0001 |
| **Had a Well Care Visit in the Last 12 Months** |  |  |  |
| Within Last Year | 954(80.2)(77.4,82.9) | 636(77.0)(72.6,81.3) | NS |
| Within Last Two Years | 174(13.5)(11.2,15.7) | 138(17.6)(13.7,21.5) |  |
| Three years or more | 78(6.2)(4.5,7.9) | 37(5.3)(2.9,7.7) |  |
| **Had a Virtual Medical Appointment in the Last 12 Months*** |  |  |  |
| Within the last year | ------------------------------- | 44(17.1(11.4,22.8) | NS |
| **In the last 12 months did you have physical therapy, speech therapy,**  **Rehabilitation therapy or occupational therapy?** | 696(8.4)(7.6,9.1) | 495(10.0)(8.9,11.1) | <.05 |
| ***Sleep Disturbances and Social Behaviors*** |  |  |  |
| **Child Wakes Up Well rested*** |  |  |  |
| Never | ------------------------------- | 2,874 (57.4)(55.6,59.2) | <.0001 |
| Some days | ------------------------------- | 1,885(35.1)(33.3,36.9) |  |
| Most days | ------------------------------- | 196(3.3)(2.7,3.9) |  |
| Every Day | ------------------------------- | 173(2.9)(2.3,3.4) |  |
| **Child has Difficulty Getting Out of Bed*** |  |  |  |
| Never | ----------------------------------- | 2,714(55.10(53.2,57.0) | <.0001 |
| Some days | ----------------------------------- | 1,628 (29.8)(28.1,31.5) |  |
| Most days | ----------------------------------- | 431 (7.4)(6.4,8.4) |  |
| Every Day | ----------------------------------- | 353 (6.3)(5.4,7.1) |  |
| **Child has Difficult Social Behaviors (5 to 17 years)** | 984(7.4)(6.7,8.0) | 670(8.3)(7.5,9.1) | <.05 |
| **Child has Difficulty with Play (2 to 4 years)** | 35(2.3)(1.4,3.2) | 24(3.0)(.86,5.3) | NS |
| **Anxiety present** | 1,425(20.2)(18.9,21.4) | 1,066(23.0)(21.3,24.7) | <.01 |
| **Depression present** | 681(4.6)(8.4,10.1) | 478(11.1)(9.7,12.5) | <.05 |
| **Took Medication for Mental Health** | 646(6.9)(6.2,7.5) | 434(7.9)(6.9,8.9) | .053 |
| *Variable not available in 2019  **NS indicates not significant. | | | |

| Table 2. Health Coverage Types, Preventive Medical Care Indicators, Sleep Disturbances, Anxiety and Depression by Anxiety, Depression and Difficult Social Behaviors in Children aged 2 to 18 years in the United States, NHIS: 2019-2020 | | | |
| --- | --- | --- | --- |
|  | Anxiety* | Depression* | Difficult Social Behavior* |
|  | (Unweighted Number)(Weighted Percent) (Confidence Intervals) | | |
| ***Child’s Gender*** |  | | |
| *Male* | 1,161(19.9)(18.4,21.3) | 499(8.3)(7.4,9.3) | 1,062(19.6)(18.2,21.1) |
| *Female* | 1,329(23.4)(21.8,24.9) | 660 (12.1)(10.8,13.5) | 591(11.5)(10.3,12.7) |
| Rao Scott Chi- square  P-Value | <..01 | <.0001 | <.0001 |
| ***Child’s Age-Group in years*** |  |  |  |
| 2 to 4* | ---------------------- | ---------------------- | ---------------------- |
| 5 to 11 | 1,048(19.8)(18.3,21.2) | 390(7.9)(6.8,9.0) | 927(18.3)(16.9,19.7) |
| 12 to 14 | 615(22.0)(19.9,24.1) | 309(11.6)(9.9,13.3) | 372(13.7)(11.9,15.4) |
| 15 to 17 | 828(25.3)(23.2,27.4) | 460(13.8)(12.2,15.4) | 355 (11.8)(10.4,13.3) |
| Rao Scott Chi- square  P-Value | <.0001 | <.0001 | <.0001 |
| ***Race/ethnicity*** |  |  |  |
| Hispanic | 448(17.1)(15.0,19.2) | 216(7.7)(6.4,9.0) | 355(14.5)(12.6,16.4) |
| Non-Hispanic White | 1,675(27.3)(25.8,28.8) | 747(12.6)(11.4,13.9) | 926(16.1)(14.8,17.5) |
| Non-Hispanic Black | 138(10.2)(8.1,12.4) | 88(6.8)(4.9,8.7) | 190(17.5)(14.7,20.3) |
| Non-Hispanic Asian | 112(12.5)(9.7,15.4) | 57(6.2)(4.3,8.1) | 103(12.5)(9.4,15.6) |
| Rao Scott Chi- square  P-Value | <.0001 | <.0001 | NS |
| ***Region of Residence of Child*** |  |  |  |
| Northeast | 425(22.8)(20.2,25.5) | 170(8.8)(6.8,10.8) | 282(15.8)(13.5,18.0) |
| Midwest | 615(26.5)(23.7,29.2) | 301(12.9)(10.7,15.0) | 385(18.1)(15.5,20.8) |
| South | 788(18.2)(16.6,19.8) | 397(9.7)(8.4,11.0) | 612(16.1)(14.7,17.5) |
| West | 663(22.0)(19.7,24.2) | 291(9.5)(8.,11.0) | 375(12.9)(11.1,14.7) |
| Rao Scott Chi- square  P-Value | <.0001 | <.05 | <.01 |
| ***Highest Level of Education of all Adults in Family*** |  |  |  |
| No high school diploma | 88(14.9)(11.0,18.9) | 60(9.6)(6.3,12.9) | 111(20.0)(15.5,24.6) |
| High school graduate | 334(16.8)(14.5,19.0) | 186(8.7)(7.2,10.2) | 323(18.2)(15.9,20.5) |
| Some college or Associate Degree | 748(21.8)(19.8,23.8) | 363(10.6)(9.0,12.2) | 544(17.3)(15.5,19.1) |
| College degree | 1,138(24.0)(22.4,25.5) | 483(10.4)(9.2,11.7) | 598(13.3)(12.0,14.6) |
| Professional or Graduate Degree | 183(24.9)(20.7,29.1) | 67(11.0)(7.4,14.6) | 631(88.0)(84.5,91.4) |
| Rao Scott Chi- square  P-Value | <.0001 | NS | <.0001 |
| ***Poverty Index Ratio***** |  |  |  |
| Less than 100% of the Federal Poverty Line | 18.1(15.2,21.0) | 10.3(8.2,12.4) | 24.8(21.6,28.0) |
| 100 to 199% of the Federal Poverty Line | 18.7(16.3,21.1) | 10.5(8.6,12.0) | 17.6(15.4,19.9) |
| 200 to 399% of the Federal Poverty Line | 21.9(20.0,23.7) | 10.0(8.5,11.5) | 13.1(11.6,14.6) |
| 400% or More of the Federal Poverty Line | 25.1(23.4,26.9) | 9.9(8.6,11.3) | 13.2(11.6,14.7) |
| Rao Scott Chi- square  P-Value | <.0001 | NS | <.0001 |
| ***Family Healthcare Type*** |  |  |  |
| Private Insurance | 7,366(12.9)(11.7,14.1) | 5,705(9.8)(8.6,10.9) | 7,366(12.9)(11.7,14.1) |
| Medicaid | 6,503(21.3)(19.3,23.3) | 3,709(10.9)(9.4,12.5) | 6,503(21.3)(19.3,23.3) |
| No Coverage | 638(14.7)(10.7,18.7) | 535(8.0)(5.5,10.6) | 6,38(14.7)(10.7,18.7) |
| Rao Scott Chi- square  P-Value | <.0001 | NS | <.0001 |
| ***Sleep Disturbances and Social Behaviors*** |  |  |  |
| **Child Wakes Up Well Rested*** | 993(22.5)(20.8,24.2) | 427(10.5)(9.2,11.9) | 62 (16.4)(14.8,17.9) |
| Rao Scott Chi- square  P-Value | <.001 | <.0001 | <.01 |
| **Child has Difficulty Getting Out of Bed*** | 657(27.1)(24.5,29.7) | 330(14.5)(12.4,16.7) | 443(20.4)(18.3,22.6) |
| Rao Scott Chi- square  P-Value | <.0001 | <.0001 | <.0001 |

*Children aged 2 years or less were not assessed for depression, anxiety and social behaviors and were excluded from the regression analysis.

**Variable not available in 2019

Table 3. Multivariate Logistic Regression Models of the Associations between Anxiety, Depression and Difficult Social Behaviors Adjusting for Survey Year, Sociodemographic Characteristics and Health Coverage Type among Adults Aged 2 to 17 years: NHIS 2019- 2020

| **Dependent Variables:** | **Anxiety Present vs. Absent** | **Depression Present vs. Absent** | **Difficult Social Behaviors Present vs. Absent** |
| --- | --- | --- | --- |
| **Independent variables: Main predictor of interest Survey Year** | Adjusted Odds Ratios (Confidence Intervals) | | |
| Survey Year (Reference 2019) | 1.3(1.0,1.6)** | 1.2(1.0,1.4)** | 1.2(1.0,1.4)** |
| Female (Reference: Male) | 1.4(1.2,1.8)** | 1.2(1.0,1.3)** | .51(.43,.61)*** |
| **Race/Ethnicity (Reference: non-Hispanic White)** |  |  |  |
| Hispanic | .53(.40,.70)*** | .59(.48,.72)*** | .77(.61, .96)* |
| non-Hispanic Black | .43(.28,.66)*** | .34(.25,.47)*** | .78(.58,1.0) |
| Non-Hispanic Asian | .38(.25,.58)*** | .36(.26,.48)*** | .75(.54,1.0) |
| **Age Group (years)(reference: 7-11years) **** |  |  |  |
| 12 to 14 | .86(.67,1.1) | .86(.71,.1.0) | 1.2(1.0,1.6)* |
| 15 to 17 | .54(.43,.68)*** | .74(.63,.88)** | 1.7(1.4,2.1)*** |
| **Child’s Family Structure (reference: Living with Both Parents)** |  |  |  |
| Single Parent Never Married | .1.0(.70,1.4) | 1.5(1.1,2.0)** | 1.0(.80,1.4) |
| Single Parent Ever Married | .69(.48,.99)* | 1.0(.80,1.4) | .81(.61,1.0) |
| Cohabitating Parents in the  Same Home | .82(.46,1.4) | 1.0(.66,1.5) | 1.1(.73,1.9) |
| At Least One Related or  Unrelated Adult | 1.4(.97,2.2) | 1.7(1.1,2.6)** | 1.4(.94,2.1) |
| **Region (reference: South)** |  |  |  |
| North East | 1.4(1.0,2.0)* | 1.1(.93,1.4) | 1.1(.90,1.5) |
| Midwest | 1.0(.76,1.4) | .87(.71,1.0) | .99(.78,1.2) |
| West | 1.3(.93,1.8) | 1.0(.86,1.3) | .83(.62,1.1) |
| **Family Education Level (reference: No High School Degree)** |  |  |  |
| High school or GED | 1.1(.66,1.9) | 1.0(.73,1.6) | .95(.65,1.3) |
| Some college or Associates degree | 1.3(.81,2.3) | 1.3(.92,2.0) | 1.0(.70,1.5) |
| Bachelor’s degree | 1.6(.92,2.8) | 1.4(.99,2.1) | .87(.58,1.2) |
| Professional or Graduate degree | 1.8(.95,3.7) | 1.6(1.0,2.6)* | .85(.49,1.4) |
| **Health Coverage Type (Reference: Private Insurance)**** |  |  |  |
| Medicaid | 1.1(.88,1.6) | 1.2(1.0,1.5)* | 1.3(1.0,1.7)** |
| No Coverage | .84(.54,1.3) | .59(.42,.82)*** | 1.0(.68,1.5) |
| **Poverty Index Ratio (Reference: Less than the Federal Poverty Line)***** |  |  |  |
| 100-199% of the Federal Poverty Line | 1.0(.72,1.4) | .92(.69,1.2) | .69(.53,.91)** |
| 200-399% of the Federal Poverty Line | .80(.53,1.2) | 1.0(.80,1.4) | .63(.46,.86)** |
| 400% or more of the Federal Poverty Line | .75(.47,1.1) | 1.1(.82,1.5) | .68(.47,.99)* |

*Children aged 2 years or less were not assessed for depression, anxiety and social behaviors and were excluded from the regression analysis.

** Health type include private insurance, Medicaid, No Coverage. No coverage was a separate variable but could not be tested alone in a regression model because it precluded having health coverage.

*** Poverty Index Ratio (PIR) as reported for the child’s family is based on Federal Poverty Line (FPL).PIR is defined as ratio of family income to the FPL. Imputed data sets were used to calculate PIR, and therefore sample numbers cannot be reported.

*<.05

**<.01

***<.0001

Compared ot
