# Supplementary material for: The Mental Health Decline in Children during the Covid-19 Pandemic.
Source: Research Square preprint supplement (doi:10.21203/rs.3.rs-4542313/v1), 2024-06-21
Supplement: Supplementary file 3 [file c91f6c109c8b09d45414e5b3.docx]

Table 3. Multivariate Logistic Regression Models of the Associations between Anxiety, Depression and Difficult Social Behaviors Adjusting for Survey Year, Sociodemographic Characteristics and Health Coverage Type among Adults Aged 2 to 17 years: NHIS 2019- 2020

| **Dependent Variables:** | **Anxiety Present vs. Absent** | **Depression Present vs. Absent** | **Difficult Social Behaviors Present vs. Absent** |
| --- | --- | --- | --- |
| **Independent variables: Main predictor of interest Survey Year** | Adjusted Odds Ratios (Confidence Intervals) | | |
| Survey Year (Reference 2019) | 1.3(1.0,1.6)** | 1.2(1.0,1.4)** | 1.2(1.0,1.4)** |
| Female (Reference: Male) | 1.4(1.2,1.8)** | 1.2(1.0,1.3)** | .51(.43,.61)*** |
| **Race/Ethnicity (Reference: non-Hispanic White)** |  |  |  |
| Hispanic | .53(.40,.70)*** | .59(.48,.72)*** | .77(.61, .96)* |
| non-Hispanic Black | .43(.28,.66)*** | .34(.25,.47)*** | .78(.58,1.0) |
| Non-Hispanic Asian | .38(.25,.58)*** | .36(.26,.48)*** | .75(.54,1.0) |
| **Age Group (years)(reference: 7-11years) **** |  |  |  |
| 12 to 14 | .86(.67,1.1) | .86(.71,.1.0) | 1.2(1.0,1.6)* |
| 15 to 17 | .54(.43,.68)*** | .74(.63,.88)** | 1.7(1.4,2.1)*** |
| **Child’s Family Structure (reference: Living with Both Parents)** |  |  |  |
| Single Parent Never Married | .1.0(.70,1.4) | 1.5(1.1,2.0)** | 1.0(.80,1.4) |
| Single Parent Ever Married | .69(.48,.99)* | 1.0(.80,1.4) | .81(.61,1.0) |
| Cohabitating Parents in the  Same Home | .82(.46,1.4) | 1.0(.66,1.5) | 1.1(.73,1.9) |
| At Least One Related or  Unrelated Adult | 1.4(.97,2.2) | 1.7(1.1,2.6)** | 1.4(.94,2.1) |
| **Region (reference: South)** |  |  |  |
| North East | 1.4(1.0,2.0)* | 1.1(.93,1.4) | 1.1(.90,1.5) |
| Midwest | 1.0(.76,1.4) | .87(.71,1.0) | .99(.78,1.2) |
| West | 1.3(.93,1.8) | 1.0(.86,1.3) | .83(.62,1.1) |
| **Family Education Level (reference: No High School Degree)** |  |  |  |
| High school or GED | 1.1(.66,1.9) | 1.0(.73,1.6) | .95(.65,1.3) |
| Some college or Associates degree | 1.3(.81,2.3) | 1.3(.92,2.0) | 1.0(.70,1.5) |
| Bachelor’s degree | 1.6(.92,2.8) | 1.4(.99,2.1) | .87(.58,1.2) |
| Professional or Graduate degree | 1.8(.95,3.7) | 1.6(1.0,2.6)* | .85(.49,1.4) |
| **Health Coverage Type (Reference: Private Insurance)**** |  |  |  |
| Medicaid | 1.1(.88,1.6) | 1.2(1.0,1.5)* | 1.3(1.0,1.7)** |
| No Coverage | .84(.54,1.3) | .59(.42,.82)*** | 1.0(.68,1.5) |
| **Poverty Index Ratio (Reference: Less than the Federal Poverty Line)***** |  |  |  |
| 100-199% of the Federal Poverty Line | 1.0(.72,1.4) | .92(.69,1.2) | .69(.53,.91)** |
| 200-399% of the Federal Poverty Line | .80(.53,1.2) | 1.0(.80,1.4) | .63(.46,.86)** |
| 400% or more of the Federal Poverty Line | .75(.47,1.1) | 1.1(.82,1.5) | .68(.47,.99)* |

*Children aged 2 years or less were not assessed for depression, anxiety and social behaviors and were excluded from the regression analysis.

** Health type include private insurance, Medicaid, No Coverage. No coverage was a separate variable but could not be tested alone in a regression model because it precluded having health coverage.

*** Poverty Index Ratio (PIR) as reported for the child’s family is based on Federal Poverty Line (FPL).PIR is defined as ratio of family income to the FPL. Imputed data sets were used to calculate PIR, and therefore sample numbers cannot be reported.

*<.05

**<.01

***<.0001
